# Supplementary material for: Mesenchymal Stem Cell-Conditioned Medium Promotes Functional Recovery Following Spinal Cord Injury: A Systematic Review and Meta-analysis
Source: PubMed Central journal article supplement — Spine Surg Relat Res. 2022 Jun 13;6(5):433–42. doi: 10.22603/ssrr.2022-0004 (PMC9605759; doi:10.22603/ssrr.2022-0004), 2022-06-13
Supplement: 2432-261X-6-0433-s001.pdf [file 2432-261X-6-0433-s001.pdf]

**Supplementary table 1:** Medline search strategy.

| <b>Database</b>             | <b>Search terms</b>                                                                                                                                                                                                                                                                                                                                                                                                                                                                                                                                                                                                                                                                                                                                                                                                                                                                                                                                                                                                                                                                                                                                                                                                                                                                                                                                                                                                                                                                                                                                                                        |
|-----------------------------|--------------------------------------------------------------------------------------------------------------------------------------------------------------------------------------------------------------------------------------------------------------------------------------------------------------------------------------------------------------------------------------------------------------------------------------------------------------------------------------------------------------------------------------------------------------------------------------------------------------------------------------------------------------------------------------------------------------------------------------------------------------------------------------------------------------------------------------------------------------------------------------------------------------------------------------------------------------------------------------------------------------------------------------------------------------------------------------------------------------------------------------------------------------------------------------------------------------------------------------------------------------------------------------------------------------------------------------------------------------------------------------------------------------------------------------------------------------------------------------------------------------------------------------------------------------------------------------------|
| <b>MEDLINE<br/>(PubMed)</b> | <p>1- “Mesenchymal Stem Cells”[Mesh] OR Stem Cell, Mesenchymal[TIAB] OR Stem Cells, Mesenchymal[TIAB] OR Mesenchymal Stem Cell[TIAB] OR Wharton Jelly Cells[TIAB] OR Wharton's Jelly Cells[TIAB] OR Wharton's Jelly Cell[TIAB] OR Whartons Jelly Cells[TIAB] OR Mesenchymal Stromal Cells[TIAB] OR Mesenchymal Stromal Cell[TIAB] OR Stromal Cell, Mesenchymal[TIAB] OR Stromal Cells, Mesenchymal[TIAB] OR Multipotent Mesenchymal Stromal Cells[TIAB] OR Mesenchymal Stromal Cells, Multipotent[TIAB] OR Mesenchymal Progenitor Cell[TIAB] OR Mesenchymal Progenitor Cells[TIAB] OR Progenitor Cell, Mesenchymal[TIAB] OR Progenitor Cells, Mesenchymal[TIAB] OR Mesenchymal Stem Cells[TIAB]</p> <p>2- “Culture Media, Conditioned”[MeSH] OR Conditioned Medium[TIAB] OR Medium, Conditioned[TIAB] OR Culture Medium, Conditioned[TIAB] OR Conditioned Culture Media[TIAB] OR Conditioned Media[TIAB] OR Media, Conditioned[TIAB] OR Conditioned Culture Medium[TIAB] OR [TIAB]</p> <p>3- “spinal cord injury”[MeSH] OR “spinal cord contusion”[MeSH] OR “spinal cord hemisection”[MeSH] OR “spinal cord transection”[MeSH] OR “cervical spine injury”[MeSH] OR “spinal cord injury”[TIAB] OR “spinal cord contusion”[TIAB] OR “spinal cord hemisection”[TIAB] OR “spinal cord transection”[TIAB] OR “cervical spine injury”[TIAB] OR “Spinal compression”[TIAB] OR “spinal cord trauma”[TIAB] OR “trauma, spinal cord”[TIAB] OR “injured spinal cord”[TIAB] OR “spinal cord injured”[TIAB] OR “spinal cord injuries”[TIAB] OR "nerve transection"[TIAB]</p> <p>4- #1 AND #2 AND #3</p> |
